# Supplementary material for: Stable cycling of a Prussian blue-based Na/Zn hybrid battery in aqueous electrolyte with a wide electrochemical window
Source: Royal Society of Chemistry journal article supplement (doi:10.1039/c9nj06024c), 2020-01-01
Supplement: c9nj06024c1.pdf [file c9nj06024c1.pdf]

## Supporting Information

### Stable cycling of Prussia blue-based Na/Zn hybrid battery in aqueous electrolyte with a wide electrochemical window

Chunli Liu,<sup>a</sup> Yunpo Sun,<sup>a</sup> Jianbo Nie,<sup>b</sup> Dong Dong,<sup>c</sup> Jian Xie<sup>\*a,d</sup> and Xinbing Zhao<sup>a,d</sup>

---

<sup>a</sup> State Key Laboratory of Silicon Materials, School of Materials Science and Engineering, Zhejiang University, Hangzhou 310027, P. R. China. E-mail: xiejian1977@zju.edu.cn; Fax: +86-571-87951451; Tel: +86-571-87952181

<sup>b</sup> State Grid Zhejiang Integrated Energy Service Co., Ltd., Hangzhou 310000, P. R. China

<sup>c</sup> Zhejiang Huayun Information Technology Co., Ltd., Hangzhou 310008, P. R. China

<sup>d</sup> Key Laboratory of Advanced Materials and Applications for Batteries of Zhejiang Province, Hangzhou 310027, P. R. China

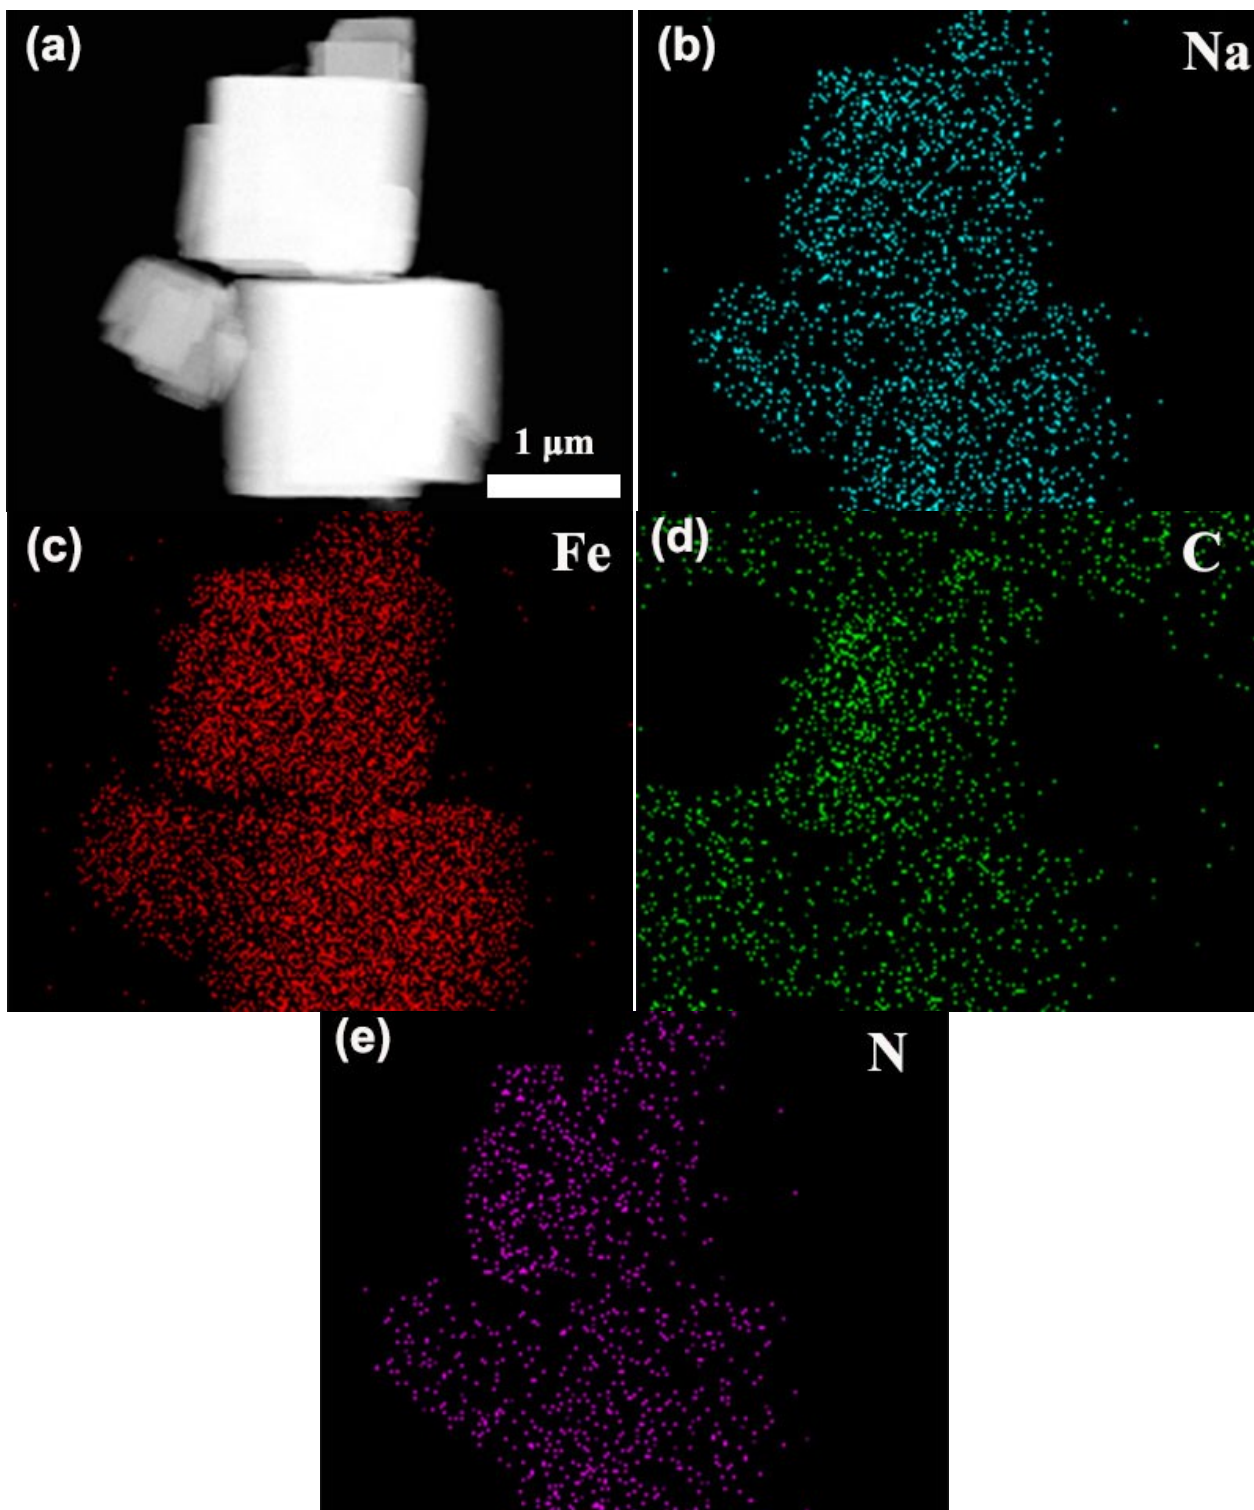

**Fig. S1** HAADF-STEM image and EDX mapping of FeHCF.

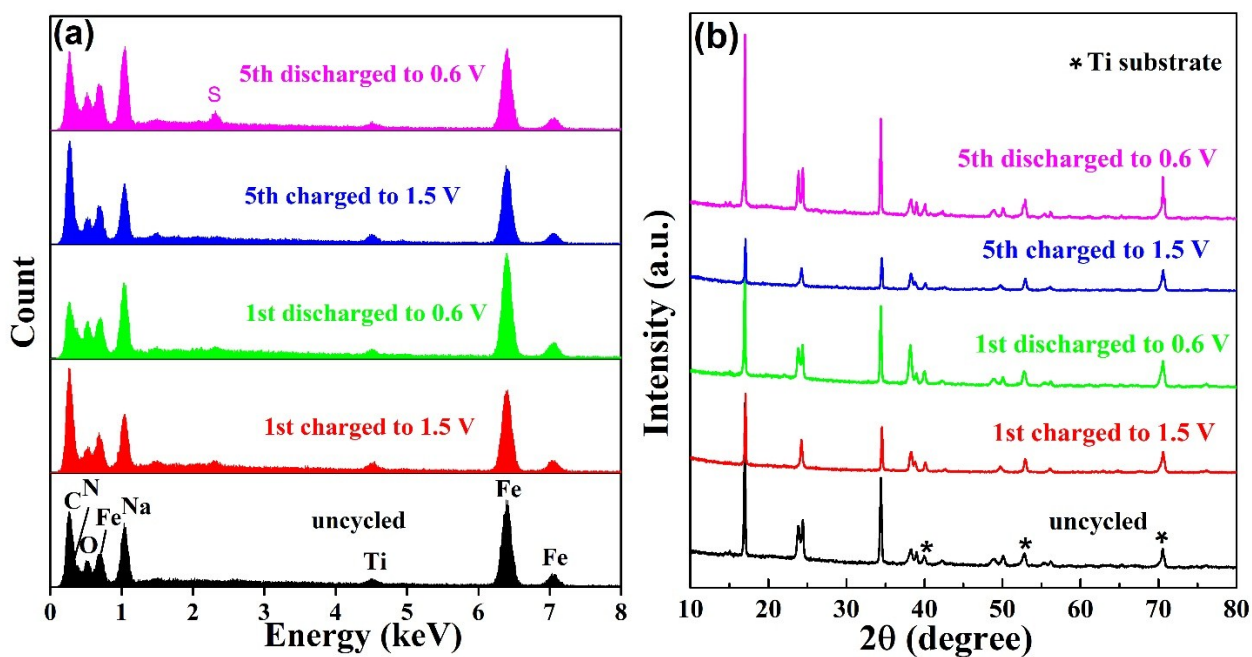

**Fig. S2** (a) EDS spectra and (b) XRD patterns of FeHCF electrodes at various charge and discharge states.

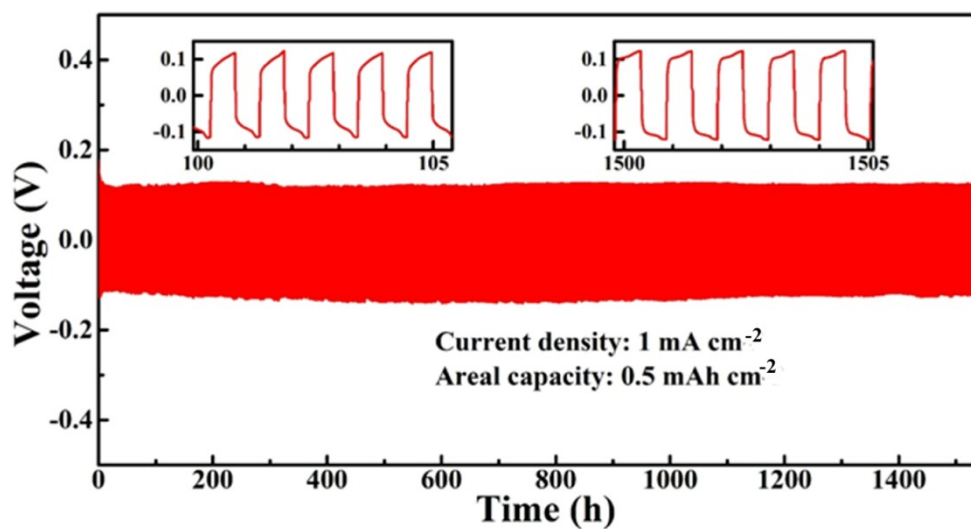

**Fig. S3** Cycling performance of symmetric Zn cell with PA-coated Zn and VC-added electrolyte at a current density of 1 mA cm<sup>-2</sup> and an areal capacity 0.5 mAh cm<sup>-2</sup>.

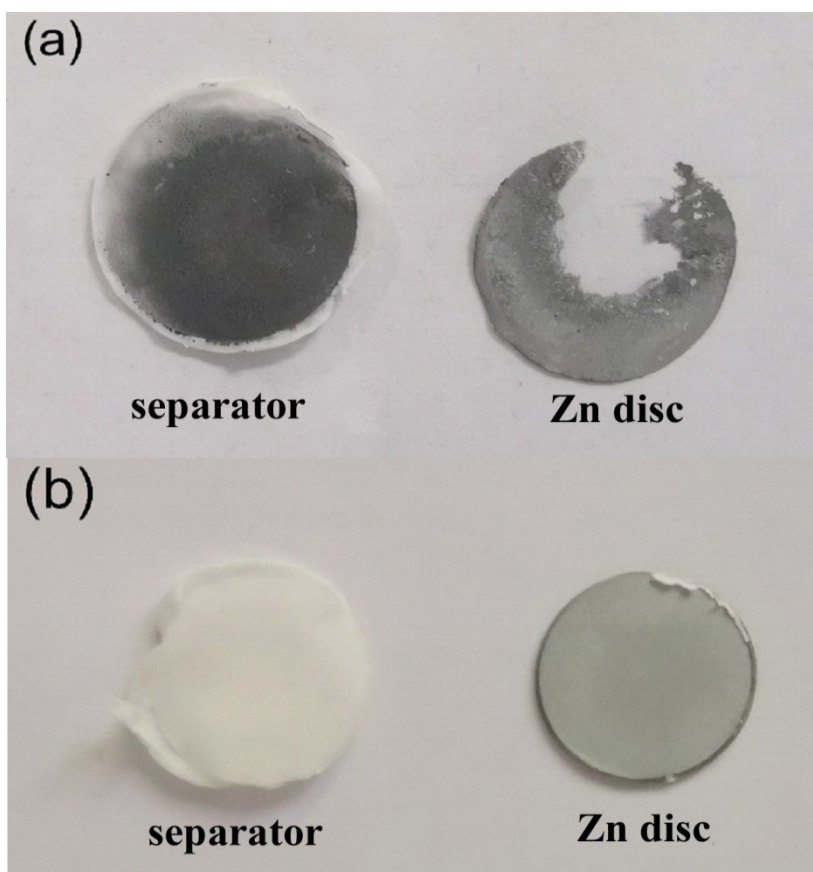

**Fig. S4** Photos of zinc anode and separator after 500 cycles in full cell with (a) bare Zn and (b) PA-coated Zn.

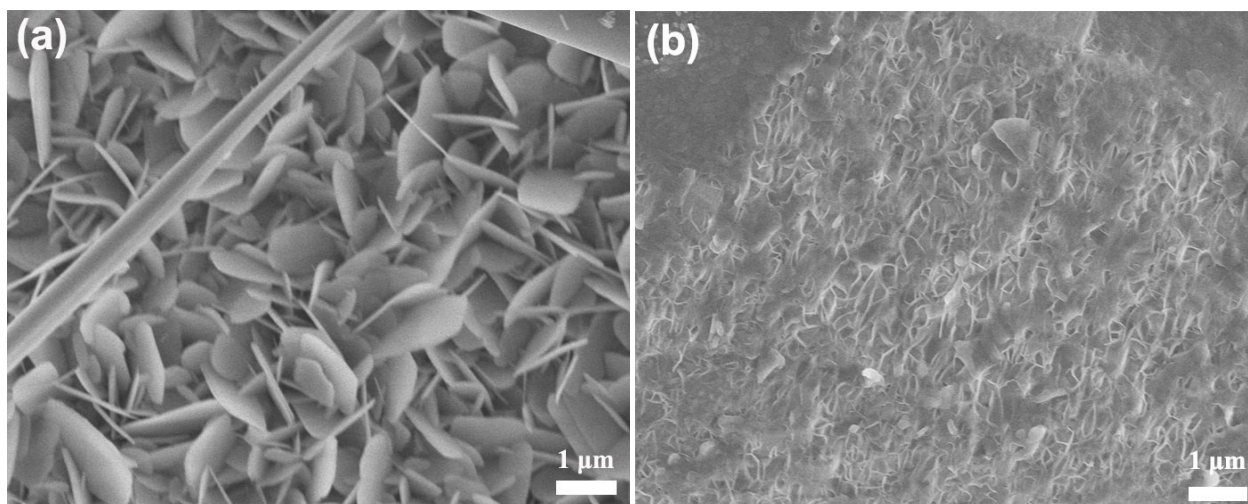

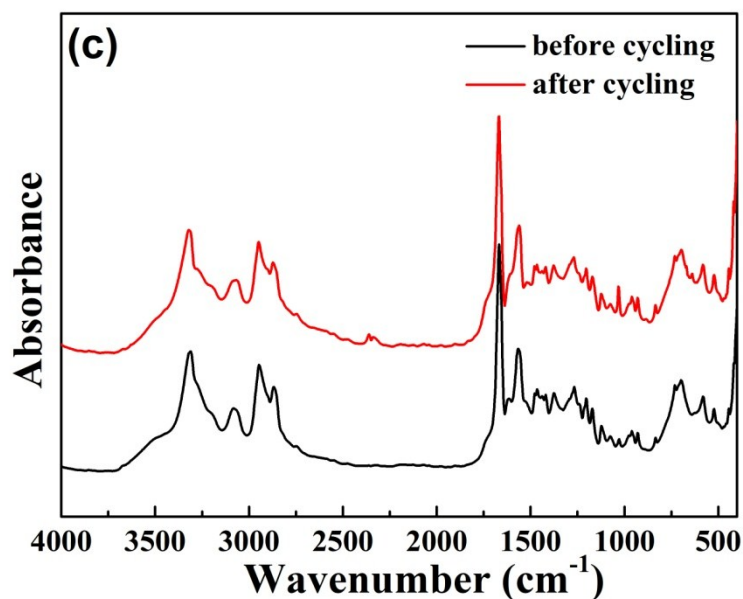

**Fig. S5** SEM images of zinc anode after 500 cycles in full cell with (a) bare Zn and (b) PA-coated Zn, and (c) FTIR spectra of PA-coated zinc before and after cycling.

**Table S1.** Comparison of electrochemical performance of PB-based cathodes in aqueous cells

| Cathode                                                                            | Anode                                             | Capacity (mAh g <sup>-1</sup> ) | Cycle number | Capacity retention            | Reference |
|------------------------------------------------------------------------------------|---------------------------------------------------|---------------------------------|--------------|-------------------------------|-----------|
| Na <sub>x</sub> FeFe(CN) <sub>6</sub>                                              | Zn                                                | 70                              | 1000         | 77% @ 1000 mA g <sup>-1</sup> | This work |
| Na <sub>x</sub> FeFe(CN) <sub>6</sub>                                              | Zn                                                | 70                              | 4000         | 60% @ 1000 mA g <sup>-1</sup> | This work |
| NiHCF                                                                              | Zn                                                | ~60                             | 1000         | >81% @ 500 mA g <sup>-1</sup> | [1]       |
| Na <sub>2</sub> MnFe(CN) <sub>6</sub>                                              | Zn                                                | ~130                            | 2000         | 75% @ 800 mA g <sup>-1</sup>  | [2]       |
| Na <sub>0.61</sub> Fe <sub>1.94</sub> (CN) <sub>6</sub> · □ <sub>0.06</sub>        | Zn                                                | ~73                             | 1000         | 80% @ 300 mA g <sup>-1</sup>  | [3]       |
| Na <sub>2</sub> NiFe(CN) <sub>6</sub>                                              | NaTi <sub>2</sub> (PO <sub>4</sub> ) <sub>3</sub> | –                               | 250          | 88% @ 500 mA g <sup>-1</sup>  | [4]       |
| Na <sub>2</sub> CuFe(CN) <sub>6</sub>                                              | NaTi <sub>2</sub> (PO <sub>4</sub> ) <sub>3</sub> | –                               | 1000         | 88% @ 1000 mA g <sup>-1</sup> | [5]       |
| Na <sub>1.24</sub> Mn[Fe(CN) <sub>6</sub> ] <sub>0.81</sub> · 1.28H <sub>2</sub> O | NaTi <sub>2</sub> (PO <sub>4</sub> ) <sub>3</sub> | 117                             | 50           | 81% @ 2 mA cm <sup>-2</sup>   | [6]       |

**Table S2.** Fitting results of the Nyquist plots using the equivalent circuit

| Full cell system                 | Sample                  | $R_e(\Omega)$ | $R_f(\Omega)$ | $Q_1$                |      | $R_{ct}(\Omega)$ | $Q_2$                |      |
|----------------------------------|-------------------------|---------------|---------------|----------------------|------|------------------|----------------------|------|
|                                  |                         |               |               | $Y$                  | $n$  |                  | $Y$                  | $n$  |
| Bare Zn & pristine electrolyte   | 10 <sup>th</sup> cycle  | 4.9           | 19.1          | $2.6 \times 10^{-4}$ | 0.64 | 61.0             | $1.1 \times 10^{-3}$ | 0.73 |
|                                  | 500 <sup>th</sup> cycle | 4.6           | 20.4          | $9.1 \times 10^{-4}$ | 0.82 | 119.3            | $3.8 \times 10^{-3}$ | 0.88 |
| Coated Zn & pristine electrolyte | 10 <sup>th</sup> cycle  | 5.1           | 83.6          | $1.3 \times 10^{-4}$ | 0.96 | 302.7            | $2.4 \times 10^{-3}$ | 0.54 |
|                                  | 500 <sup>th</sup> cycle | 1.9           | 38.2          | $1.2 \times 10^{-4}$ | 0.99 | 204.7            | $1.5 \times 10^{-3}$ | 0.55 |
| Coated Zn & VC added electrolyte | 10 <sup>th</sup> cycle  | 1.7           | 187.2         | $2.4 \times 10^{-4}$ | 0.83 | 295.3            | $2.9 \times 10^{-3}$ | 0.56 |
|                                  | 500 <sup>th</sup> cycle | 9.6           | 49.4          | $1.1 \times 10^{-4}$ | 0.99 | 170.7            | $1.7 \times 10^{-3}$ | 0.59 |

## References

- 1 K. Lu, B. Song, J. T. Zhang and H. Y. Ma, *J. Power Sources*, 2016, **321**, 257–263.
- 2 Z. G. Hou, X. Q. Zhang, X. N. Li, Y. C. Zhu, J. W. Liang and Y. T. Qian, *J. Mater. Chem. A*, 2017, **5**, 730–738.
- 3 L. P. Wang, P. F. Wang, T. S. Wang, Y. X. Yin, Y. G. Guo and C. R. Wang, *J. Power Sources*, 2017, **355**, 18–22.
- 4 X. Y. Wu, Y. L. Cao, X. P. Ai, J. F. Qian and H. X. Yang, *Electrochem. Commun.*, 2013, **31**, 145–148.
- 5 X. Y. Wu, M. Y. Sun, Y. F. Shen, J. F. Qian, Y. L. Cao, X. P. Ai and H. X. Yang, *ChemSusChem*, 2014, **7**, 407–411.
- 6 K. Nakamoto, R. Sakamoto, M. Ito, A. Kitajou and S. Okada, *Electrochemistry*, 2017, **85**, 179–185.
